# Supplementary material
Source: PubMed Central journal article supplement (PMC9752559)
Supplement: mmc1.pdf [file mmc1.pdf]

Supplementary Materials: *Effect of the COVID-19 pandemic on heatstroke-related ambulance dispatch in the 47 prefectures of Japan*

|                              |   |
|------------------------------|---|
| Supplementary Figure 1 ..... | 2 |
| Supplementary Figure 2 ..... | 3 |
| Supplementary Table 1.....   | 4 |
| Supplementary Table 2.....   | 6 |
| Supplementary Table 3.....   | 7 |

## Supplementary Figure 1

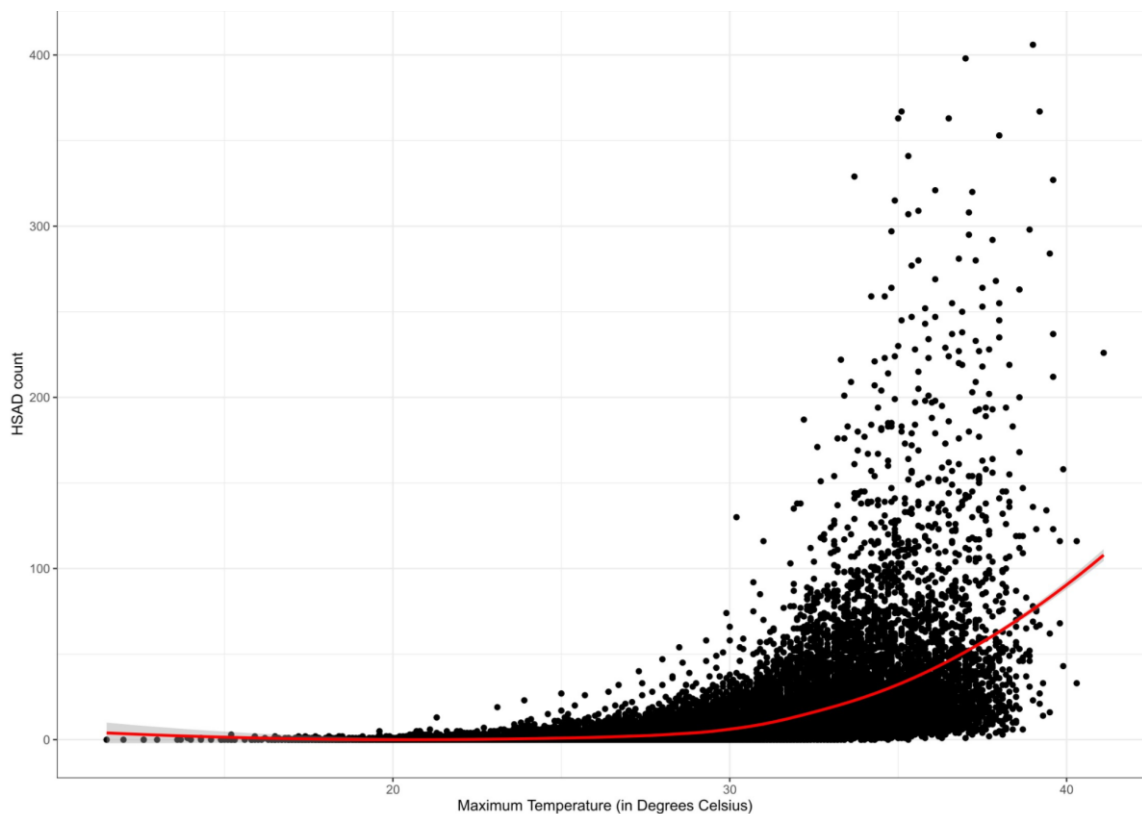

Figure S1. Simple linear regression (with loess fit; in red) of daily HSAD and maximum temperature

Daily HSAD data was fitted with daily maximum temperature with an apparent log-linear increase beyond the 80<sup>th</sup> temperature percentile, as depicted by the red solid line. Below the 80<sup>th</sup> temperature percentile, there was no apparent pattern, with nearly flatter fitted line.

## Supplementary Figure 2

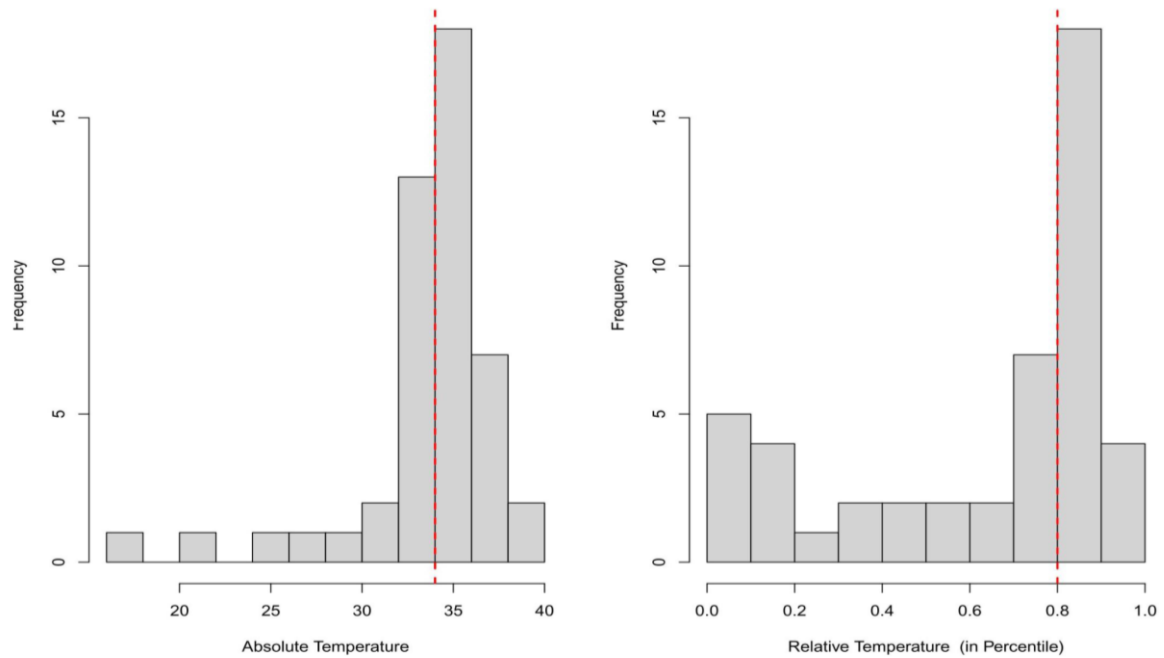

**Figure S2.** Absolute (left) and relative (right) temperature distribution of prefecture specific change point temperatures with respective median values (in vertical red dotted lines)

We first identified the prefecture-specific thresholds using the absolute temperature. After which, the absolute temperature thresholds were then transformed to relative temperature thresholds by locating the percentile location of the absolute temperature threshold in the prefecture-specific percentile distribution. We then plotted the distribution of the relative temperature thresholds across of the 47 prefectures. Owing to the skewed distribution, we utilized the median value as a threshold point; at 80<sup>th</sup> temperature percentile. We back calculated the absolute temperature threshold at the 80<sup>th</sup> temperature percentile per prefecture and proceeded with the prefecture-specific hockey stick model.

## Supplementary Table 1

**Table S1.** Absolute and relative temperature (in percentile) estimated using segmented regression modeling

| Prefecture | Absolute Temperature | Relative Temperature (percentile) |
|------------|----------------------|-----------------------------------|
| Hokkaido   | 25.49937515          | 0.863717671                       |
| Aomori     | 29.30000699          | 0.970491278                       |
| Iwate      | 17.20005141          | 0.877051469                       |
| Miyagi     | 33.10004441          | 0.890091218                       |
| Akita      | 32.5000052           | 0.843153283                       |
| Yamagata   | 36.48220178          | 0.78032788                        |
| Fukushima  | 20.79981204          | 0.863938731                       |
| Ibaraki    | 31.88936982          | 0.934426442                       |
| Tochigi    | 36.67876592          | 0.856906075                       |
| Gunma      | 36.60000896          | 0.888531694                       |
| Saitama    | 27.00020216          | 0.89205246                        |
| Chiba      | 34.70016828          | 0.121312276                       |
| Tokyo      | 35.09999639          | 0.799999513                       |
| Kanagawa   | 35.3994623           | 0.796722321                       |
| Niigata    | 32.89999986          | 0.521976092                       |
| Toyama     | 33.59001142          | 0.840908734                       |
| Ishikawa   | 33.49998045          | 0.767213413                       |
| Fukui      | 34.40432624          | 0.835301634                       |
| Yamanashi  | 37.40007273          | 0.815768973                       |
| Nagano     | 34.20606379          | 0.893305249                       |
| Gifu       | 39.00108607          | 0.859016258                       |
| Shizuoka   | 33.5994669           | 0.742621858                       |
| Aichi      | 36.7999329           | 0.875407941                       |
| Mie        | 33.40000694          | 0.957606189                       |
| Shiga      | 36.41828812          | 0.850097074                       |
| Kyoto      | 38.19986604          | 0.214788734                       |
| Osaka      | 34.86958007          | 0.0475398                         |
| Hyogo      | 32.99997708          | 0.136066277                       |
| Nara       | 34.50004213          | 0.049174448                       |
| Wakayama   | 31.98401028          | 0.597683718                       |
| Tottori    | 34.76247425          | 0.067178614                       |
| Shimane    | 34.22331681          | 0.079175636                       |

|           |             |             |
|-----------|-------------|-------------|
| Okayama   | 36.70000243 | 0.940984778 |
| Hiroshima | 35.29951745 | 0.436067575 |
| Yamaguchi | 35.30100106 | 0.198353206 |
| Tokushima | 34.00002118 | 0.696712235 |
| Kagawa    | 35.35892346 | 0.426253702 |
| Ehime     | 34.45761273 | 0.813726026 |
| Kochi     | 33.93166729 | 0.667211239 |
| Fukuoka   | 34.6132924  | 0.838131612 |
| Saga      | 34.0999966  | 0.365516082 |
| Nagasaki  | 33.14702573 | 0.805200545 |
| Kumamoto  | 33.79999228 | 0.708195388 |
| Oita      | 34.69999996 | 0.162295099 |
| Miyazaki  | 32.60000141 | 0.795081413 |
| Kagoshima | 35.29997643 | 0.07374183  |
| Okinawa   | 32.09999905 | 0.326230412 |

---

Table S1 depicts the prefecture-absolute temperature thresholds and their corresponding temperature percentile location. The relative temperature percentile values were plotted to locate the central measure of the distribution, which was at the 80<sup>th</sup> percentile. The corresponding plot is shown in Figure S2, right panel.

## Supplementary Table 2

Table S2. Sensitivity analyses regarding the adjustment and non-adjustment of PM2.5

| Model | Specifications                                                                                                 | <sup>1</sup> Pooled Estimates | p-value |
|-------|----------------------------------------------------------------------------------------------------------------|-------------------------------|---------|
| I     | Period Coverage: 2016-2020<br>Prefectures: All 47 prefectures<br>PM2.5: Not adjusted                           | 0.78 (0.75 – 0.82)            | 1.00    |
| II    | Period Coverage: 2016-2018 and 2020 (excluding 2019)<br>Prefectures: All 47 prefectures<br>PM2.5: Not adjusted | 0.70 (0.64 – 0.76)            | 0.55    |
| III   | Period Coverage: 2016-2018 and 2020 (excluding 2019)<br>Prefectures: All 47 prefectures<br>PM2.5: Adjusted     | 0.79 (0.74 – 0.85)            | 0.79    |

<sup>1</sup> The pooled estimates are estimated via random effects meta-analysis through a restrictive maximum likelihood (REML) parameterization.

We initially started with Model I with full period coverage without adjusting for PM2.5. Since at the moment, the harmonized and publicly available PM2.5 data for all prefectures is not yet available for 2019, we proceeded with the utilizing the pre-pandemic period (2016 to 2018) together with the advanced reported (non-harmonized) 2020 data; as shown in Models II and III. We observe that the adjustment of PM2.5 (Model III) was not significantly different from the non-adjustment in Model II. Utilizing these results, we assumed that the non-adjustment of PM2.5 in the full model with the 47 prefectures for 2016 to 2020 would not be significantly different even with adjustment evident in the calculated p-value.

Supplementary Table 3

Table S3. Summary statistics by prefecture, comparing pre COVID-19 (2016-2019) and COVID-19 (2020)

| Prefecture | Pre-COVID-19 period (2016-2019) |             |                          |             |                       |             | COVID-19 period (2020) |          |                          |          |                       |          |
|------------|---------------------------------|-------------|--------------------------|-------------|-----------------------|-------------|------------------------|----------|--------------------------|----------|-----------------------|----------|
|            | HSAD                            |             | Maximum Temperature (°C) |             | Relative Humidity (%) |             | HSAD                   |          | Maximum Temperature (°C) |          | Relative Humidity (%) |          |
|            | Mean                            | SD          | Mean                     | SD          | Mean                  | SD          | Mean                   | SD       | Mean                     | SD       | Mean                  | SD       |
| Hokkaido   | 9.545081967                     | 20.82699876 | 24.25819672              | 4.196250212 | 72.8852459            | 9.360844415 | 8.918033               | 12.76915 | 25.12295                 | 3.935929 | 75.46721              | 7.971213 |
| Aomori     | 3.206967213                     | 6.096098377 | 25.58545082              | 3.92984858  | 78.07581967           | 8.443579468 | 3.508197               | 6.619837 | 26.21393                 | 3.823618 | 79.55738              | 8.410982 |
| Iwate      | 4.37704918                      | 7.823597086 | 26.4557377               | 4.382376488 | 79.31557377           | 9.080000547 | 4.893443               | 6.771119 | 26.93689                 | 3.93833  | 81.31148              | 9.264776 |
| Miyagi     | 7.733606557                     | 14.46438442 | 26.44651639              | 4.142996881 | 79.52459016           | 10.89502881 | 8.795082               | 14.65636 | 26.79918                 | 4.282339 | 83.07377              | 9.690387 |
| Akita      | 4.006147541                     | 6.550229483 | 26.89651639              | 4.189559743 | 76.86680328           | 9.612442977 | 4.139344               | 6.018313 | 27.3623                  | 3.628613 | 78.58197              | 9.532754 |
| Yamagata   | 4.31147541                      | 7.218880068 | 28.17889344              | 4.368106503 | 74.58811475           | 9.371218451 | 4.983607               | 6.917439 | 28.78443                 | 4.236247 | 75.93443              | 10.07799 |
| Fukushima  | 9.008196721                     | 14.64234578 | 28.42745902              | 4.7467685   | 75.99590164           | 10.9488255  | 9.090164               | 12.85585 | 28.7623                  | 4.691408 | 78.85246              | 10.49807 |
| Ibaraki    | 12.37909836                     | 19.18936579 | 28.04467213              | 4.042979096 | 80.09221311           | 8.329316673 | 12.95082               | 17.04435 | 28.17623                 | 4.094161 | 82.15574              | 7.463432 |
| Tochigi    | 7.653688525                     | 12.69015313 | 28.76844262              | 4.219849939 | 78.85860656           | 9.99663638  | 7.565574               | 11.35744 | 28.89344                 | 4.211902 | 82.36066              | 8.465843 |
| Gunma      | 10.08606557                     | 17.12799894 | 29.45881148              | 4.516831882 | 73.13114754           | 12.56258309 | 10.06557               | 13.38047 | 29.80164                 | 4.533821 | 77.27869              | 11.79176 |
| Saitama    | 30.79918033                     | 47.78206686 | 29.97213115              | 4.645432497 | 74.08196721           | 11.96218557 | 33.01639               | 45.29809 | 30.08033                 | 4.734446 | 80.0082               | 10.00371 |
| Chiba      | 22.7807377                      | 34.79595963 | 28.85245902              | 3.680376133 | 76.80327869           | 9.363426025 | 24.66393               | 34.08512 | 29.01885                 | 3.770072 | 77.4918               | 7.999221 |
| Tokyo      | 39.43237705                     | 65.345799   | 29.07766393              | 4.101946885 | 80.0942623            | 10.56957626 | 47.85246               | 70.40106 | 29.37705                 | 4.214434 | 82.52459              | 9.17976  |
| Kanagawa   | 24.36065574                     | 37.12420256 | 28.79754098              | 3.902107325 | 78.96311475           | 9.568228576 | 26.9918                | 39.30396 | 29.18607                 | 3.945713 | 80.91803              | 8.229749 |
| Niigata    | 10.24385246                     | 14.82547211 | 27.94446721              | 4.010024672 | 76.90163934           | 8.68940192  | 9.696721               | 13.09463 | 28.38115                 | 3.556145 | 79.14754              | 9.30269  |
| Toyama     | 3.635245902                     | 5.58103892  | 28.93831967              | 4.14977138  | 77.67418033           | 9.864918728 | 3.729508               | 5.489339 | 29.53525                 | 4.065109 | 80.83607              | 9.722905 |
| Ishikawa   | 4.903688525                     | 7.15169648  | 28.98483607              | 3.899867788 | 71.53278689           | 9.139965201 | 5.344262               | 7.438753 | 29.35246                 | 3.516577 | 73.28689              | 9.476792 |
| Fukui      | 3.256147541                     | 4.71769389  | 29.7647541               | 4.008833616 | 74.89139344           | 9.118796601 | 2.983607               | 3.863334 | 30.0959                  | 3.79792  | 77.7377               | 9.481433 |
| Yamanashi  | 3.608606557                     | 5.889859007 | 30.82868852              | 4.129798152 | 68.31762295           | 10.59558705 | 3.827869               | 5.267541 | 30.90328                 | 4.115239 | 76.58197              | 9.066185 |
| Nagano     | 7.375                           | 11.49451927 | 28.67991803              | 4.374643006 | 75.36885246           | 8.876705847 | 7.204918               | 9.035228 | 29.0377                  | 4.152055 | 77.13934              | 9.387274 |
| Gifu       | 10.56557377                     | 17.70450479 | 30.95286885              | 3.951844625 | 69.20491803           | 11.91116228 | 9.491803               | 10.93652 | 31.19754                 | 3.807571 | 71.39344              | 12.36601 |
| Shizuoka   | 13.4897541                      | 18.46089984 | 29.47786885              | 3.331900748 | 75.65778689           | 8.575052207 | 16.46721               | 26.21185 | 29.96148                 | 3.326911 | 80.18033              | 8.329988 |
| Aichi      | 33.99795082                     | 52.7537964  | 30.80553279              | 3.886953659 | 69.70696721           | 11.63714723 | 33.61475               | 42.46018 | 31.11148                 | 3.810559 | 74.7623               | 11.74597 |
| Mie        | 9.446721311                     | 15.34454499 | 29.33668033              | 3.639429695 | 69.65983607           | 10.64428902 | 10.09016               | 12.27037 | 29.51639                 | 3.337846 | 71.07377              | 10.79345 |
| Shiga      | 5.93647541                      | 8.834205356 | 29.49139344              | 3.801956659 | 75.31147541           | 8.352925656 | 5.327869               | 7.207024 | 29.72459                 | 3.634188 | 77.96721              | 8.541522 |
| Kyoto      | 14.15778689                     | 20.91936462 | 31.23893443              | 4.043551473 | 67.92213115           | 10.19069118 | 12.36885               | 15.20505 | 31.32213                 | 4.034265 | 69.58197              | 11.42915 |
| Osaka      | 38.71106557                     | 54.2277928  | 31.03094262              | 3.745185209 | 69.70696721           | 9.738584779 | 39.90984               | 51.60947 | 31.1377                  | 3.696108 | 71.01639              | 10.53054 |
| Hyogo      | 26.05327869                     | 35.05075858 | 29.82991803              | 3.366535151 | 71.95696721           | 10.04303842 | 24.90984               | 29.73631 | 29.84344                 | 3.387214 | 73.54098              | 10.8202  |

|           |             |             |             |             |             |             |          |          |          |          |          |          |
|-----------|-------------|-------------|-------------|-------------|-------------|-------------|----------|----------|----------|----------|----------|----------|
| Nara      | 7.805327869 | 11.13041102 | 30.6647541  | 3.910895057 | 74.30942623 | 9.668666622 | 6.909836 | 8.193935 | 31.07131 | 3.932162 | 74.31148 | 9.942049 |
| Wakayama  | 5.493852459 | 6.631698745 | 30.30983607 | 3.345060653 | 73.1352459  | 9.145085839 | 5.434426 | 6.78597  | 30.37623 | 3.415958 | 74.36885 | 8.816027 |
| Tottori   | 3.450819672 | 5.094753043 | 30.11086066 | 4.208252487 | 76.10655738 | 9.012705954 | 3.401639 | 3.531815 | 30.2459  | 4.100537 | 76.94262 | 9.503631 |
| Shimane   | 3.540983607 | 4.942208172 | 29.13627049 | 4.003927233 | 79.10860656 | 8.421791897 | 3.360656 | 3.865648 | 29.14672 | 4.060212 | 79.47541 | 9.452109 |
| Okayama   | 12.62909836 | 16.73932691 | 30.66598361 | 3.809044496 | 73.96106557 | 9.745030877 | 10.7377  | 11.82993 | 30.92705 | 3.942836 | 75.32787 | 10.49789 |
| Hiroshima | 14.19262295 | 18.39716373 | 30.22090164 | 3.696645575 | 66.37295082 | 10.33267211 | 12.38525 | 13.85488 | 30.12787 | 3.622594 | 66.38525 | 10.29117 |
| Yamaguchi | 5.989754098 | 8.068616003 | 30.74979508 | 3.941033537 | 77.70081967 | 9.63186017  | 5.008197 | 6.997633 | 30.34508 | 3.95577  | 79.29508 | 9.41222  |
| Tokushima | 3.774590164 | 4.981527461 | 29.92520492 | 3.477932775 | 76.76229508 | 10.38938273 | 4.090164 | 4.882088 | 30.19262 | 3.564614 | 77.12295 | 10.1057  |
| Kagawa    | 5.135245902 | 6.973560183 | 30.59631148 | 3.768167045 | 72.37295082 | 10.21776475 | 5.393443 | 5.781929 | 30.91721 | 3.852501 | 73.18033 | 10.55174 |
| Ehime     | 7.395491803 | 9.311258126 | 30.38278689 | 3.567384599 | 73.2397541  | 10.12396964 | 7.180328 | 7.639627 | 30.53197 | 3.405083 | 74.12295 | 8.991803 |
| Kochi     | 4.282786885 | 5.811016835 | 30.21536885 | 3.064486496 | 78.67622951 | 9.7907097   | 3.877049 | 4.520985 | 30.15656 | 3.252335 | 80.54098 | 9.331496 |
| Fukuoka   | 21.88319672 | 27.12940857 | 30.55245902 | 3.651614098 | 75.55737705 | 8.954183339 | 20.51639 | 24.33419 | 30.25574 | 3.516503 | 75.45902 | 8.90366  |
| Saga      | 4.965163934 | 6.244242981 | 31.02192623 | 3.830161128 | 74.44467213 | 10.68366368 | 4.245902 | 5.371045 | 30.6123  | 3.486185 | 76.9918  | 10.67591 |
| Nagasaki  | 7.18442623  | 8.888702845 | 29.83258197 | 3.333660063 | 80.43237705 | 9.744557628 | 6.467213 | 8.356899 | 29.22541 | 2.845514 | 83.66393 | 8.68228  |
| Kumamoto  | 11.6454918  | 13.77523222 | 31.16659836 | 3.762051287 | 75.41803279 | 10.85187947 | 10.7459  | 11.98729 | 30.9582  | 3.535063 | 77.61475 | 10.22187 |
| Oita      | 6.399590164 | 7.576181188 | 29.86331967 | 3.791542902 | 77.59221311 | 10.50919715 | 6.032787 | 6.701344 | 29.91639 | 3.494301 | 78.64754 | 9.384286 |
| Miyazaki  | 6.375       | 7.746016397 | 29.77479508 | 3.135869181 | 82.63319672 | 8.21319395  | 6.040984 | 7.474914 | 30.15492 | 3.471992 | 82.06557 | 7.256502 |
| Kagoshima | 11.2192623  | 11.45543449 | 31.0522541  | 3.077886125 | 78.28893443 | 8.023868429 | 10.89344 | 12.93519 | 30.58934 | 3.343399 | 80.17213 | 7.57518  |
| Okinawa   | 7.776639344 | 6.262343653 | 31.32971311 | 1.912113745 | 79.99180328 | 6.969273604 | 6.590164 | 5.29268  | 31.37951 | 1.703663 | 83.53279 | 5.027502 |

\* SD=standard deviation; degrees Celsius (°C); percentage (%)

Table S3 shows the prefecture-specific summary statistics HSAD, maximum temperature and relative humidity in Pre-COVID-19 and COVID-19 period. Specifically, central measure (mean) is shown alongside the spread (standard deviation) for each combination of prefecture and variable of interest.
